# Supplementary material for: In situ recrystallization of lanthanide coordination polymers: from 1D ladder chains to 1D linear chains
Source: Royal Society of Chemistry journal article supplement (doi:10.1039/c6ce00182c), 2016-01-01
Supplement: c6ce00182c1.pdf [file c6ce00182c1.pdf]

Supplementary Information

## In Situ Recrystallization of Lanthanide Coordination Polymer: From 1D Ladder Chain to 1D Linear Chain

Jing-Wen Sun, Shang-Ju Li, Peng-Fei Yan,\* Xu Yao, and Guang-Ming Li\*

Key Laboratory of Functional Inorganic Material Chemistry (MOE), School of Chemistry and Materials Science,  
Heilongjiang University, No. 74, Xuefu Road, Nangang District, Harbin 150080, People's Republic of China

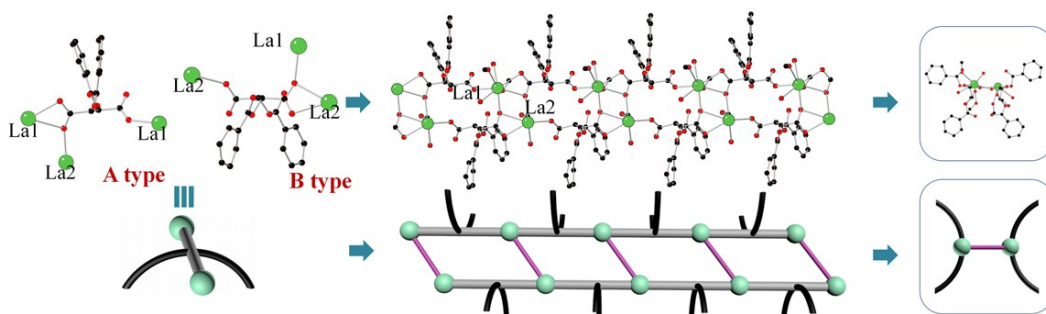

**Figure S1.** Combined ball/stick and cartoon representations of 1D ladder chain constructed by A-type, B-type ligands and La(III) cations (the insert pictures show the side view of 1D ladder chain) in **1a**

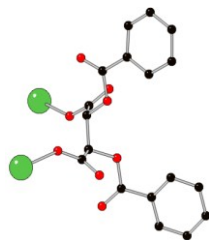

**Figure S2.** The coordination mode of L-DBTA<sup>2-</sup> anions in complex **1**: ( $\kappa^1$ )-( $\kappa^1$ )- $\mu_2$

**Table S1** Crystal Data and Structure Refinements for Complexes **1a–4a** and **1–6**.

| Complexes                                                                                                      | <b>1a</b>                                                       | <b>2a</b>                                                       | <b>3a</b>                                                       | <b>4a</b>                                                       | <b>1</b>                                           |
|----------------------------------------------------------------------------------------------------------------|-----------------------------------------------------------------|-----------------------------------------------------------------|-----------------------------------------------------------------|-----------------------------------------------------------------|----------------------------------------------------|
| CCDC                                                                                                           | 855715                                                          | 855716                                                          | 855717                                                          | 855718                                                          | 723332                                             |
| Empirical formula                                                                                              | C <sub>58</sub> H <sub>68</sub> La <sub>2</sub> O <sub>36</sub> | C <sub>58</sub> H <sub>62</sub> Ce <sub>2</sub> O <sub>33</sub> | C <sub>58</sub> H <sub>68</sub> Pr <sub>2</sub> O <sub>36</sub> | C <sub>57</sub> H <sub>60</sub> Nd <sub>2</sub> O <sub>33</sub> | C <sub>44</sub> H <sub>56</sub> LaNO <sub>22</sub> |
| Formula weight                                                                                                 | 1618.94                                                         | 1567.32                                                         | 1622.94                                                         | 1561.53                                                         | 1089.81                                            |
| Crystal system                                                                                                 | Monoclinic                                                      |                                                                 |                                                                 |                                                                 | Orthorhombic                                       |
| Space group                                                                                                    | <i>P2<sub>1</sub></i>                                           |                                                                 |                                                                 |                                                                 | <i>P2<sub>1</sub>2<sub>1</sub>2</i>                |
| a (Å)                                                                                                          | 9.4321(19)                                                      | 9.4048(19)                                                      | 9.3330(9)                                                       | 9.3238(19)                                                      | 20.164(4)                                          |
| b (Å)                                                                                                          | 23.555(5)                                                       | 23.598(5)                                                       | 23.444(2)                                                       | 23.424(5)                                                       | 16.345(5)                                          |
| c (Å)                                                                                                          | 16.669(3)                                                       | 16.683(3)                                                       | 16.4638(15)                                                     | 16.730(3)                                                       | 16.679(5)                                          |
| $\alpha$ (°)                                                                                                   | 90                                                              |                                                                 |                                                                 |                                                                 | 90                                                 |
| $\beta$ (°)                                                                                                    | 102.81(3)                                                       | 102.47(3)                                                       | 103.6280                                                        | 102.70(3)                                                       | 90                                                 |
| $\gamma$ (°)                                                                                                   | 90                                                              |                                                                 |                                                                 |                                                                 | 90                                                 |
| <i>V</i> (Å <sup>3</sup> )                                                                                     | 3611.3(12)                                                      | 3615.2(13)                                                      | 3500.9(6)                                                       | 3564.5(12)                                                      | 5497(3)                                            |
| <i>F</i> (000)                                                                                                 | 1636                                                            | 1580                                                            | 1644                                                            | 1572                                                            | 2240                                               |
| <i>Z</i>                                                                                                       | 2                                                               |                                                                 |                                                                 |                                                                 | 4                                                  |
| <i>D</i> <sub>calc</sub> (g·cm <sup>-3</sup> )                                                                 | 1.489                                                           | 1.440                                                           | 1.540                                                           | 1.455                                                           | 1.317                                              |
| $\mu$ (mm <sup>-1</sup> )                                                                                      | 1.256                                                           | 1.327                                                           | 1.467                                                           | 1.524                                                           | 0.850                                              |
| $\theta$ Range(°)                                                                                              | 3.05–27.48                                                      | 3.04–27.48                                                      | 2.46–28.29                                                      | 3.04–27.48                                                      | 3.21–25.00                                         |
| Reflections collected                                                                                          | 33350                                                           | 34320                                                           | 20200                                                           | 34980                                                           | 41258                                              |
| Unique reflections                                                                                             | 14914                                                           | 16238                                                           | 12976                                                           | 15890                                                           | 9558                                               |
| <i>R</i> <sub>int</sub>                                                                                        | 0.0445                                                          | 0.0599                                                          | 0.0256                                                          | 0.0577                                                          | 0.0787                                             |
| <i>R</i> <sub>1</sub> <sup>a</sup> , <i>wR</i> <sub>2</sub> <sup>b</sup> ( <i>I</i> > 2 $\sigma$ ( <i>I</i> )) | 0.0520, 0.1323                                                  | 0.0628, 0.1505                                                  | 0.0540, 0.1436                                                  | 0.0577, 0.1580                                                  | 0.0640, 0.1686                                     |
| <i>R</i> <sub>1</sub> <sup>a</sup> , <i>wR</i> <sub>2</sub> <sup>b</sup> (all data)                            | 0.0731, 0.1568                                                  | 0.1027, 0.1733                                                  | 0.0632, 0.1536                                                  | 0.1028, 0.2134                                                  | 0.0962, 0.1903                                     |
| GOF on <i>F</i> <sup>2</sup>                                                                                   | 1.031                                                           | 0.964                                                           | 1.065                                                           | 1.093                                                           | 1.047                                              |

$$^a R_1 = \frac{\sum ||F_o| - |F_c||}{\sum |F_o|}, \quad ^b wR_2 = \frac{\sum [w(F_o^2 - F_c^2)^2]}{\sum [w(F_o^2)]^{1/2}}.$$

**Table S1** continued.

| Complexes                                                              | 2                                                  | 3                                                  | 4                                                  | 5                                                  | 6                                                  |
|------------------------------------------------------------------------|----------------------------------------------------|----------------------------------------------------|----------------------------------------------------|----------------------------------------------------|----------------------------------------------------|
| CCDC                                                                   | 859164                                             | 848922                                             | 859165                                             | 723336                                             | 723334                                             |
| Empirical formula                                                      | C <sub>44</sub> H <sub>56</sub> CeNO <sub>22</sub> | C <sub>44</sub> H <sub>56</sub> PrNO <sub>22</sub> | C <sub>44</sub> H <sub>56</sub> NdNO <sub>22</sub> | C <sub>44</sub> H <sub>56</sub> GdNO <sub>22</sub> | C <sub>44</sub> H <sub>56</sub> LuNO <sub>22</sub> |
| Formula weight                                                         | 1091.02                                            | 1091.80                                            | 1095.14                                            | 1108.15                                            | 1125.87                                            |
| Crystal system                                                         | Orthorhombic                                       |                                                    |                                                    |                                                    |                                                    |
| Space group                                                            | P2 <sub>1</sub> 2 <sub>1</sub> 2                   |                                                    |                                                    |                                                    |                                                    |
| a (Å)                                                                  | 20.195(4)                                          | 20.285(4)                                          | 20.169(4)                                          | 20.140(4)                                          | 20.052(7)                                          |
| b (Å)                                                                  | 16.765(3)                                          | 16.776(3)                                          | 16.722(3)                                          | 16.625(3)                                          | 16.350(4)                                          |
| c (Å)                                                                  | 16.778(3)                                          | 16.805(3)                                          | 16.759(3)                                          | 16.701(3)                                          | 16.623(4)                                          |
| α (°)                                                                  | 90                                                 |                                                    |                                                    |                                                    |                                                    |
| β (°)                                                                  | 90                                                 |                                                    |                                                    |                                                    |                                                    |
| γ (°)                                                                  | 90                                                 |                                                    |                                                    |                                                    |                                                    |
| V (Å <sup>3</sup> )                                                    | 5680(2)                                            | 5719(2)                                            | 5652(2)                                            | 5592.0(19)                                         | 5450(3)                                            |
| F (000)                                                                | 2244                                               | 2244                                               | 2252                                               | 2268                                               | 2296                                               |
| Z                                                                      | 4                                                  |                                                    |                                                    |                                                    |                                                    |
| D <sub>calc</sub> (g·cm <sup>-3</sup> )                                | 1.276                                              | 1.267                                              | 1.287                                              | 1.316                                              | 1.372                                              |
| μ (mm <sup>-1</sup> )                                                  | 0.871                                              | 0.922                                              | 0.922                                              | 1.257                                              | 1.885                                              |
| θ Range (°)                                                            | 3.16–27.48                                         | 3.15–27.48                                         | 3.16–27.47                                         | 3.18–27.48                                         | 3.22–25.00                                         |
| Reflections collected                                                  | 56086                                              | 53660                                              | 55249                                              | 53532                                              | 38445                                              |
| Unique reflections                                                     | 13015                                              | 13073                                              | 12928                                              | 12723                                              | 9484                                               |
| R <sub>int</sub>                                                       | 0.0436                                             | 0.1059                                             | 0.0459                                             | 0.0474                                             | 0.0756                                             |
| R <sub>1</sub> <sup>a</sup> , wR <sub>2</sub> <sup>b</sup> (I > 2σ(I)) | 0.0510, 0.1687                                     | 0.0529, 0.1436                                     | 0.0512, 0.1632                                     | 0.0474, 0.1390                                     | 0.0554, 0.1415                                     |
| R <sub>1</sub> <sup>a</sup> , wR <sub>2</sub> <sup>b</sup> (all data)  | 0.0555, 0.1737                                     | 0.1107, 0.1623                                     | 0.0577, 0.1682                                     | 0.0586, 0.1464                                     | 0.0752, 0.1559                                     |
| GOF on F <sup>2</sup>                                                  | 1.088                                              | 0.908                                              | 1.082                                              | 1.065                                              | 1.069                                              |

<sup>a</sup>R<sub>1</sub> = Σ||F<sub>0</sub>|| - F<sub>c</sub>|| / Σ|F<sub>0</sub>||. <sup>b</sup>wR<sub>2</sub> = Σ[w(F<sub>0</sub><sup>2</sup> - F<sub>c</sub><sup>2</sup>)<sup>2</sup>] / Σ[w(F<sub>0</sub><sup>2</sup>)<sup>2</sup>]<sup>1/2</sup>.

**Table S2** Selected bond lengths (Å) and angles (°) for complexes **1a–4a** and **1–6**

|                   | <b>1a</b> | <b>2a</b> | <b>3a</b> | <b>4a</b> |
|-------------------|-----------|-----------|-----------|-----------|
| O(3)–Ln(1)        | 2.623(6)  | 2.601(7)  | 2.574(6)  | 2.557(8)  |
| O(4)–Ln(1)        | 2.754(5)  | 2.749(6)  | 2.697(6)  | 2.713(7)  |
| O(11)–Ln(1)       | 2.430(8)  | 2.425(9)  | 2.419(8)  | 2.389(9)  |
| O(22)–Ln(1)       | 2.484(5)  | 2.472(6)  | 2.447(5)  | 2.425(7)  |
| O(25)–Ln(1)       | 2.548(9)  | 2.522(8)  | 2.500(7)  | 2.455(10) |
| O(26)–Ln(1)       | 2.578(8)  | 2.533(8)  | 2.544(7)  | 2.500(9)  |
| O(27)–Ln(1)       | 2.668(8)  | 2.642(9)  | 2.668(8)  | 2.594(12) |
| O(31)–Ln(1)       | 2.542(9)  | 2.520(10) | 2.520(7)  | 2.476(10) |
| O2(5)–Ln(1)       | 2.417(6)  | 2.425(7)  | 2.418(7)  | 2.392(8)  |
| O(4)–Ln(2)        | 2.505(5)  | 2.485(6)  | 2.474(6)  | 2.449(6)  |
| O(12)–Ln(2)       | 2.506(7)  | 2.487(7)  | 2.476(6)  | 2.430(8)  |
| O(13)–Ln(2)       | 2.527(6)  | 2.496(7)  | 2.498(6)  | 2.474(8)  |
| O(21)–Ln(2)       | 2.580(6)  | 2.571(6)  | 2.538(7)  | 2.551(7)  |
| O(22)–Ln(2)       | 2.817(5)  | 2.813(6)  | 2.784(5)  | 2.780(6)  |
| O(28)–Ln(2)       | 2.514(7)  | 2.505(9)  | 2.477(7)  | 2.434(9)  |
| O(29)–Ln(2)       | 2.564(7)  | 2.548(7)  | 2.533(6)  | 2.508(8)  |
| O(30)–Ln(2)       | 2.577(7)  | 2.560(8)  | 2.533(7)  | 2.543(10) |
| O1(19)–Ln(2)      | 2.445(6)  | 2.425(5)  | 2.387(5)  | 2.398(7)  |
| O(3)–Ln(1)–O(4)   | 48.46(17) | 48.4(2)   | 49.39(18) | 49.0(2)   |
| O(4)–Ln(1)–O(22)  | 66.96(16) | 67.05(19) | 67.01(18) | 66.5(2)   |
| O(4)–Ln(1)–O(11)  | 70.2(2)   | 69.9(2)   | 69.9(2)   | 69.9(3)   |
| O(5)–Ln(1)–O(22)  | 84.8(2)   | 84.7(2)   | 84.9(2)   | 85.7(3)   |
| O(4)–Ln(2)–O(22)  | 65.68(16) | 65.85(19) | 65.27(19) | 65.1(2)   |
| O(12)–Ln(2)–O(13) | 66.60(18) | 67.1(2)   | 67.0(2)   | 67.6(2)   |
| O(12)–Ln(2)–O(22) | 69.83(19) | 69.2(2)   | 70.5(2)   | 69.9(3)   |
| O(21)–Ln(2)–O(22) | 47.82(17) | 47.67(19) | 48.61(18) | 48.6(2)   |

**Table S2** continued

|                    | <b>1</b> | <b>2</b>  | <b>3</b> | <b>4</b>  | <b>5</b>  | <b>6</b> |
|--------------------|----------|-----------|----------|-----------|-----------|----------|
| O(8)–Ln(1)         | 2.455(6) | 2.450(3)  | 2.457(4) | 2.426(3)  | 2.375(3)  | 2.330(6) |
| O(16)–Ln(1)        | 2.445(5) | 2.418(3)  | 2.429(5) | 2.394(3)  | 2.341(3)  | 2.294(5) |
| O(17)–Ln(1)        | 2.590(6) | 2.559(3)  | 2.504(6) | 2.521(3)  | 2.463(3)  | 2.394(5) |
| O(18)–Ln(1)        | 2.527(6) | 2.516(3)  | 2.483(5) | 2.484(3)  | 2.419(4)  | 2.342(6) |
| O(4)–Ln(2)         | 2.490(5) | 2.461(3)  | 2.442(5) | 2.437(3)  | 2.391(3)  | 2.356(5) |
| O(12)–Ln(2)        | 2.446(5) | 2.448(3)  | 2.401(5) | 2.421(3)  | 2.384(3)  | 2.314(5) |
| O(19)–Ln(2)        | 2.529(6) | 2.521(3)  | 2.556(6) | 2.487(3)  | 2.428(4)  | 2.320(5) |
| O(20)–Ln(2)        | 2.530(6) | 2.520(3)  | 2.483(5) | 2.487(4)  | 2.428(3)  | 2.321(5) |
| O(16)–Ln(1)–O1(16) | 83.4(3)  | 81.69(15) | 76.7(3)  | 80.92(16) | 79.59(17) | 77.0(3)  |
| O1(8)–Ln(1)–O(8)   | 81.3(3)  | 79.45(16) | 76.3(2)  | 78.87(17) | 76.94(19) | 76.3(3)  |
| O2(4)–Ln(2)–O3(4)  | 80.1(3)  | 77.20(14) | 79.3(3)  | 76.77(15) | 75.80(17) | 74.4(3)  |
| O1(12)–Ln(2)–O(12) | 79.3(3)  | 77.77(15) | 81.0(3)  | 76.75(15) | 75.33(16) | 74.6(2)  |

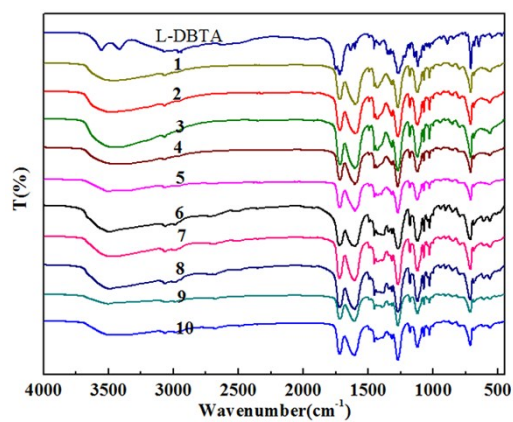

Figure S3. Infrared spectra of L-DBTA and complexes **1a–4a** and **1–6**

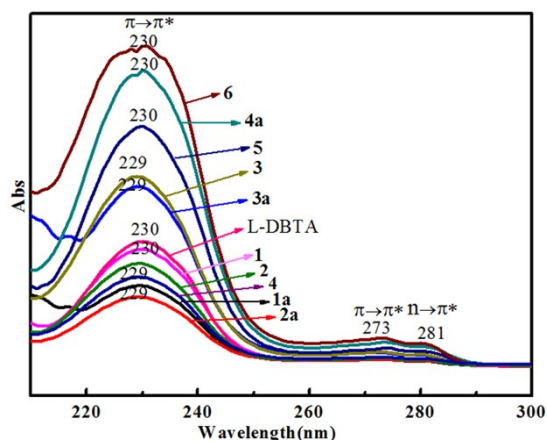

Figure S4. Ultraviolet spectra of L-DBTA and complexes **1a–4a** and **1–6**

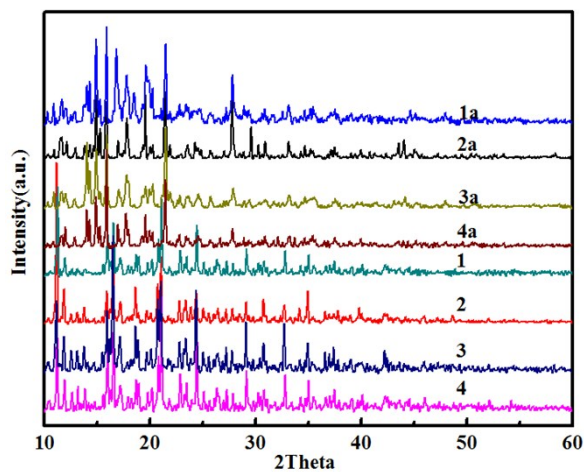

Figure S5. PXRD patterns of complexes **1a–4a** and **1–4**

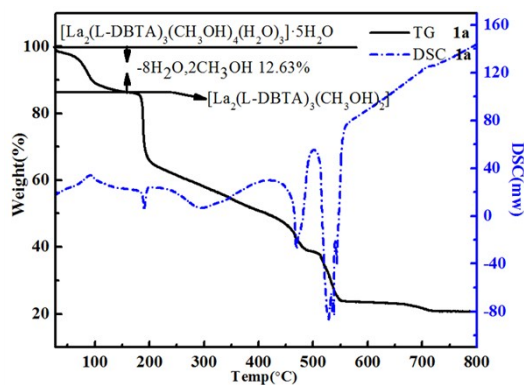

Figure S6. TG–DSC curves of complex 1a

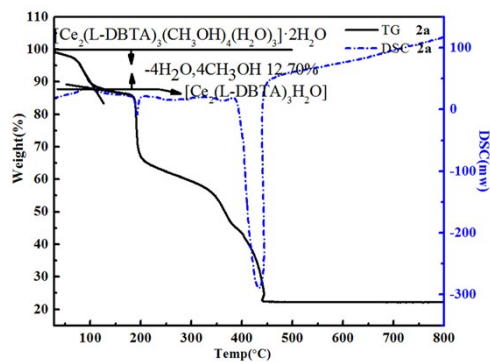

Figure S7. TG–DSC curves of complex 2a

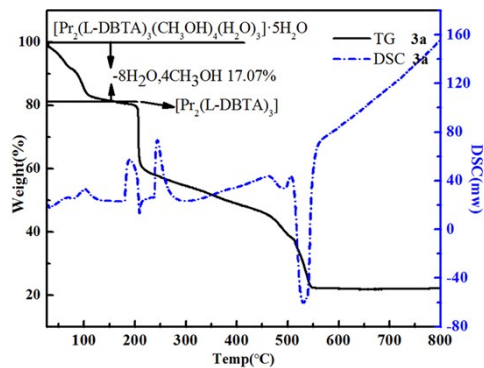

Figure S8. TG–DSC curves of complex 3a

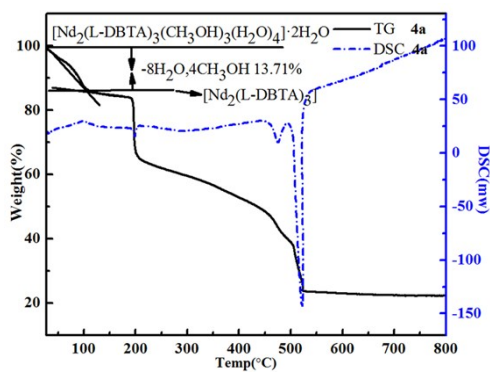

**Figure S9.** TG–DSC curves of complex **4a**

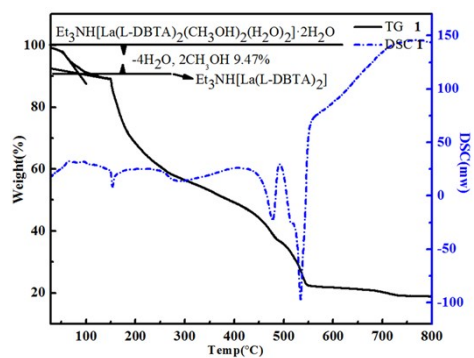

**Figure S10.** TG–DSC curves of complex **1**

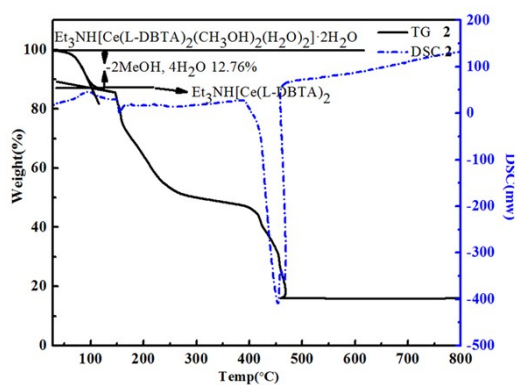

**Figure S11.** TG–DSC curves of complex **2**

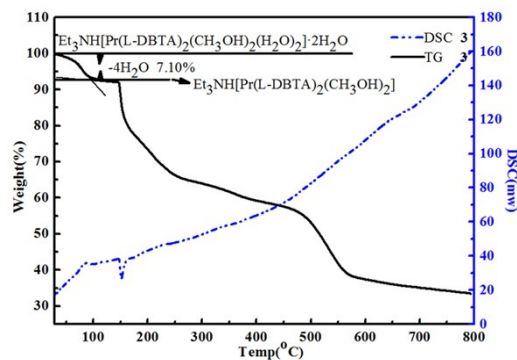

**Figure S12.** TG–DSC curves of complex **3**

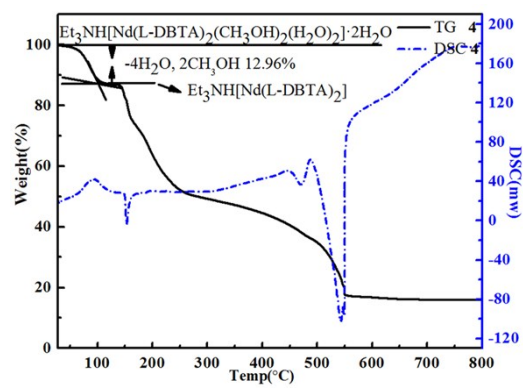

Figure S13. TG–DSC curves of complex 4

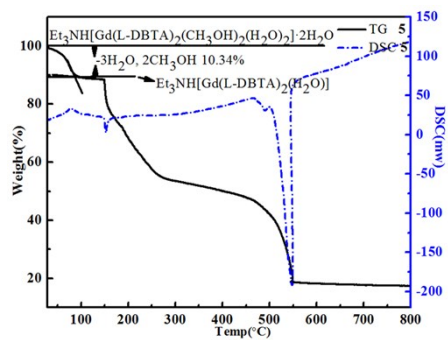

Figure S14. TG–DSC curves of complex 5

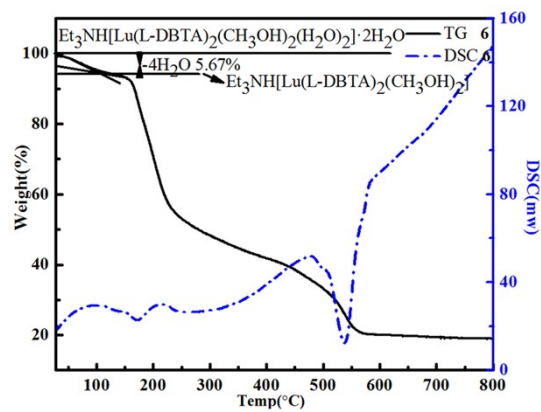

Figure S15. TG–DSC curves of complex 6



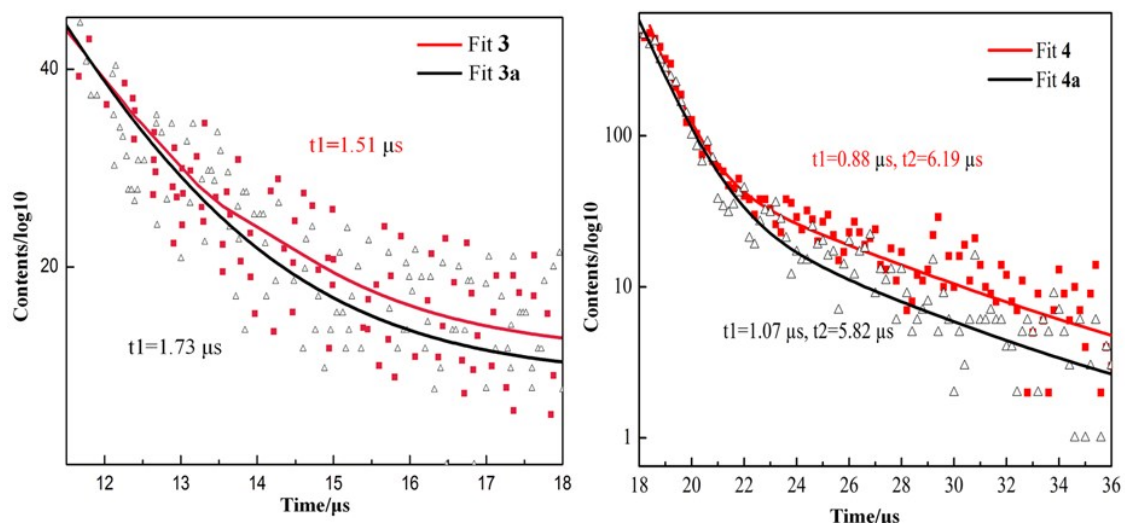

Figure S16. Room-temperature luminescence decay curves of complexes 3a, 3, 4a and 4
